# Supplementary material for: Cardiometabolic Risk Factors in Young Adults Who Were Born Preterm
Source: PubMed Central journal article supplement (PMC4445394; doi:10.1093/aje/kwu443), 2015-05-05
Supplement: supp_kwu443_kwu443supp.pdf [file supp_kwu443_kwu443supp.pdf]

## Web Material

### Cardiometabolic Risk Factors in Young Adults Born Preterm

Web Table 1. Confirmation of Lengths of Gestation of the Subjects, Northern Finland, 2009-2011.

Web Table 2. Characteristics of the participants and nonparticipants according to Northern Finland Birth Cohort (NFBC) 1986 and Finnish Medical Birth Register data, Northern Finland 1985-1986 and 2001-2002.

Web Appendix: Laboratory Analyses

Web Table 3. Measured and Calculated Cardiometabolic Markers Grouped According to Pathophysiological Pathways, Northern Finland, 2009-2011.

Web Table 4. Geometric means (SD) for controls and mean differences ( 95% CIs) in plasma lipids in young women and men born preterm compared with their controls.

Web Table 1. Confirmation of Lengths of Gestation of the Subjects, Northern Finland, 2009-2011.

| Gestational age according to NFBC/FMBR data | Gestational age according to medical records |              |          |
|---------------------------------------------|----------------------------------------------|--------------|----------|
|                                             | Early preterm                                | Late preterm | Controls |
| <34 wk.                                     | 145                                          | 3            | 4        |
| 34-36 wk                                    | 4                                            | 238          | 23       |
| ≥37 wk.                                     | 0                                            | 7            | 353      |
| Total n in GA group*                        | 149                                          | 248          | 380      |

Abbreviation: FMBR, Finnish Medical Birth Register; GA, gestational age; NFBC, Northern Finland Birth Cohort.

\*Gestational age was missing in 2 subjects after conformation of the gestational age.

Web Table 2. Characteristics of the participants and nonparticipants according to Northern Finland Birth Cohort (NFBC) 1986 and Finnish Medical Birth Register data, Northern Finland 1985-1986 and 2001-2002.

| Characteristics                                               | Early preterm      |                        | P Value | Late preterm       |                        | P Value | Controls           |                        | P Value |
|---------------------------------------------------------------|--------------------|------------------------|---------|--------------------|------------------------|---------|--------------------|------------------------|---------|
|                                                               | Study Participants | Study Non-participants |         | Study Participants | Study Non-participants |         | Study Participants | Study Non-participants |         |
| No. of subjects                                               | 134                | 188                    |         | 242                | 371                    |         | 344                | 613                    |         |
| Male, No. (%)                                                 | 65 (48.5)          | 78 (41.5)              | 0.08    | 120 (49.6)         | 226 (60.9)             | 0.006   | 169 (49.1)         | 354 (57.7)             | 0.01    |
| Mother's age, mean (SD), y                                    | 28.9 (5.4)         | 28.1 (5.6)             | 0.48    | 28.4 (6.0)         | 28.1 (6.1)             | 0.51    | 28.0 (5.5)         | 27.7 (5.4)             | 0.77    |
| Maternal hypertension in pregnancy, No. (%)                   | 24 (27.6)          | 21 (16.8)              | 0.06    | 16 (11.9)          | 27 (14.4)              | 0.52    | 2 (1.5)            | 7 (2.9)                | 0.39    |
| Maternal smoking during pregnancy, No.(%)                     | 19 (14.2)          | 33 (17.6)              | 0.42    | 61 (25.2)          | 105 (28.3)             | 0.40    | 68 (19.8)          | 150 (24.5)             | 0.10    |
| Multiple pregnancy, No.(%)                                    | 32 (23.9)          | 35 (18.6)              | 0.25    | 33 (13.6)          | 68 (18.3)              | 0.13    | 4 (1.2)            | 9 (1.5)                | 0.70    |
| Primiparous, No. (%)                                          | 53 (39.6)          | 81 (43.1)              | 0.53    | 105 (43.4)         | 128 (34.5)             | 0.03    | 106 (30.8)         | 202 (33.0)             | 0.50    |
| Maternity hospital, No. (%)                                   |                    |                        | 0.05    |                    |                        | 0.93    |                    |                        | 0.87    |
| Primary or secondary                                          | 101 (75.4)         | 158 (84.0)             |         | 184 (76.0)         | 281 (75.7)             |         | 272 (79.1)         | 482 (78.6)             |         |
| Tertiary                                                      | 33 (24.6)          | 30 (16.0)              |         | 58 (24.0)          | 90 (24.3)              |         | 72 (20.9)          | 131 (21.4)             |         |
| Gestational age at birth, mean (SD), weeks                    | 31.8 (1.6)         | 31.7 (1.8)             | 0.38    | 35.5 (0.9)         | 35.5 (0.7)             | 0.29    | 39.6 (1.3)         | 39.6 (1.2)             | 0.13    |
| Birth weight, mean (SD), g                                    | 1780 (486)         | 1798 (554)             | 0.38    | 2675 (513)         | 2697 (538)             | 0.93    | 3568 (479)         | 3629 (488)             | 0.46    |
| Standard deviation score for birth weight (SD)                | -0.75 (1.4)        | -0.36 (2.5)            | 0.16    | -0.63 (1.3)        | -0.61 (1.3)            | 0.63    | -0.03 (1.0)        | 0.08 (1.0)             | 0.51    |
| Birth weight standard deviation score less than -2.0, No. (%) | 22 (16.4)          | 30 (16.0)              | 0.91    | 29 (12.0)          | 41 (11.1)              | 0.72    | 7 (2.0)            | 13 (2.1)               | 0.93    |
| Age at 01/01/2009, mean (SD), years                           | 21.4 (1.5)         | 21.3 (1.5)             | 0.30    | 21.7 (1.4)         | 21.8 (1.5)             | 0.60    | 22.0 (1.4)         | 22.0 (1.4)             | 0.86    |

Web Table 2 (continued).

| Characteristics                                          | Early preterm <sup>a</sup> |                        | P Value | Late preterm <sup>a</sup> |                        | P Value | Controls           |                        | P Value |
|----------------------------------------------------------|----------------------------|------------------------|---------|---------------------------|------------------------|---------|--------------------|------------------------|---------|
|                                                          | Study Participants         | Study Non-participants |         | Study Participants        | Study Non-participants |         | Study Participants | Study Non-participants |         |
| No. of members of NFBC 1986 at 16 y of age (%)           | 47 (35.1)                  | 63 (33.5)              | 0.77    | 108 (44.6)                | 184 (49.6)             | 0.23    | 208 (60.5)         | 369 (60.2)             | 0.94    |
| Participated in 16 y study, No. (%) <sup>b</sup>         | 40 (85.1)                  | 39 (61.9)              | 0.007   | 94 (87.0)                 | 127 (69.0)             | 0.001   | 178 (85.6)         | 255 (69.1)             | <0.001  |
| Parental education at 2001–2002, No. (%) <sup>b</sup>    |                            |                        | 0.29    |                           |                        | 0.48    |                    |                        | 0.39    |
| Elementary                                               | 2 (5.3)                    | 7 (20.0)               |         | 5 (5.6)                   | 8 (6.8)                |         | 5 (2.9)            | 11 (4.2)               |         |
| High school                                              | 14 (36.8)                  | 11 (31.4)              |         | 27 (30.0)                 | 43 (36.8)              |         | 75 (44.1)          | 97 (36.6)              |         |
| Intermediate                                             | 19 (50.0)                  | 14 (40.0)              |         | 42 (46.7)                 | 53 (45.3)              |         | 63 (37.1)          | 116 (43.8)             |         |
| University                                               | 3 (7.9)                    | 3 (8.6)                |         | 16 (7.8)                  | 13 (11.)               |         | 27 (15.9)          | 41 (15.5)              |         |
| Body mass index at 16 years, mean (SD) kg/m <sup>2</sup> | 20.4 (2.7)                 | 21.3 (3.6)             | 0.27    | 21.1 (3.1)                | 21.3 (4.9)             | 0.70    | 20.6 (2.8)         | 21.4 (3.6)             | 0.02    |
| Systolic blood pressure, mean (SD), mmHg                 | 118.9 (12.8)               | 118.3 (11.8)           | 0.85    | 116.7 (13.7)              | 117.5 (13.7)           | 0.72    | 115.3 (12.3)       | 115.4 (13.7)           | 0.95    |
| Diastolic blood pressure, mean (SD), mmHg                | 70.5 (8.0)                 | 69.3 (7.5)             | 0.56    | 67.9 (7.2)                | 67.6 (8.1)             | 0.81    | 67.8 (7.2)         | 67.1 (8.1)             | 0.38    |
| Fasting plasma glucose, mean (SD), mmol/l                | 5.1 (1.08)                 | 5.2 (1.13)             | 0.64    | 5.2 (1.06)                | 5.1 (1.12)             | 0.68    | 5.1(1.08)          | 5.2 (1.09)             | 0.19    |
| Fasting serum insulin, mean (SD), mmol/l                 | 10.0 (1.47)                | 10.8 (1.65)            | 0.23    | 9.8 (1.54)                | 9.9 (1.69)             | 0.89    | 8.9 (1.51)         | 9.9 (1.53)             | 0.01    |
| HOMA-IR, mean (SD)                                       | 1.3 (1.63)                 | 1.3 (1.75)             | 0.89    | 1.3 (1.46)                | 1.4 (1.62)             | 0.54    | 1.1(1.52)          | 1.3 (1.52)             | 0.006   |
| Total cholesterol, mean (SD), mmol/l                     | 4.4 (1.20)                 | 4.4 (1.15)             | 0.72    | 4.2 (1.22)                | 4.2 (1.20)             | 0.76    | 4.2 (1.17)         | 4.2 (1.22)             | 0.72    |
| HDL cholesterol, mean (SD), mmol/l                       | 1.4 (1.27)                 | 1.4 (1.23)             | 0.78    | 1.3 (1.25)                | 1.4 (1.24)             | 0.34    | 1.4 (1.23)         | 1.4 (1.22)             | 0.87    |
| LDL cholesterol, mean (SD), mmol/l                       | 2.3 (1.36)                 | 2.2 (1.27)             | 0.62    | 2.2 (1.28)                | 2.2 (1.32)             | 0.97    | 2.2 (1.24)         | 2.2 (1.30)             | 0.99    |
| Triglycerides, mean (SD), mmol/l                         | 0.8 (1.65)                 | 0.7 (1.54)             | 0.39    | 0.8 (1.56)                | 0.8 (1.54)             | 0.61    | 0.8 (1.49)         | 0.7 (1.50)             | 0.61    |
| Apolipoprotein A1, mean (SD), g/l                        | 1.4 (1.13)                 | 1.4 (1.16)             | 0.16    | 1.3 (1.17)                | 1.4 (1.15)             | 0.11    | 1.4 (1.16)         | 1.3 (1.15)             | 0.55    |
| Apolipoprotein B, mean (SD) g/l                          | 0.7 (1.34)                 | 0.7 (1.27)             | 0.97    | 0.7 (1.25)                | 0.7 (1.31)             | 0.81    | 0.7 (1.22)         | 0.6 (1.29)             | 0.66    |
| Physical disability at 16 years, No. (%) <sup>†</sup>    | 0 (0.0)                    | 8 (4.3)                | 0.02    | 1 (0.4)                   | 6 (1.6)                | 0.17    | 1 (0.3)            | 7 (1.1)                | 0.17    |

<sup>a</sup>Means other than height are geometric means and standard deviations (SD). The geometric mean is the  $n^{\text{th}}$  root of the product of  $n$  values. Geometric standard deviations correspond to the percentage increase in a variable corresponding to one standard deviation unit change in the logarithm of the variable.

<sup>b</sup> % of the NFBC members.

## WEB APPENDIX: LABORATORY ANALYSES

Plasma glucose (fasting and 2-hour), total cholesterol (TC), high- and low-density lipoprotein cholesterol (HDL-C and LDL-C), triglycerides (TGs), uric acid, alanine aminotransferase (ALT), aspartate transaminase (AST), gamma glutamate, albumin and urea were analyzed by using an Advia 2400 automatic chemical analyzer (Siemens Diagnostics, Terrytown, NY, USA) and blood leucocytes were counted in an automatic electronic cell counter (Abbott CELL-DYN Sapphire, Abbott Diagnostics, USA) at Oulu University Hospital laboratory. Serum concentrations of insulin, lipoprotein (a) (LPa), apolipoprotein A1 (ApoA1), apolipoprotein B (ApoB), high-sensitivity C-reactive protein (hsCRP; values >10 mg/l were excluded from analysis), in the Disease Risk Unit of the National Institute for Health and Welfare. The following methods were used: chemiluminescent microparticle immunoassay (CMIA, Abbott Laboratories, USA) for insulin, an immunoturbidimetric method (Abbott Laboratories, USA) for LPa, ApoA1 and ApoB and a latex immunoassay (Sentinel Diagnostics, Italy) for hsCRP. During the course of the measurements the between-batch coefficient of variation in reference samples was <2.9% for insulin, <1.8% for LPa, <1.9% for ApoA1, <3.2% for ApoB and <9.4% for hsCRP. The limit of quantification for the Architect testosterone assay is 0.08 nmol/l. We used a validated calculator program (available at [www.dtu.ox.ac.uk](http://www.dtu.ox.ac.uk)) to define homeostasis model assessment values for insulin resistance (HOMA-IR) from paired fasting glucose and insulin levels.

Web Table 3. Measured and Calculated Cardiometabolic Markers Grouped According to Pathophysiological Pathways, Northern Finland, 2009-2011.

| Pathway/Group             | Variables                                           | Data Presented in |
|---------------------------|-----------------------------------------------------|-------------------|
| Metabolic syndrome        | Metabolic syndrome                                  | Figure 2, Table 2 |
| Body size and composition | Obesity                                             | Figure 2, Table 2 |
|                           | Height                                              | Table 3           |
|                           | Body mass index (BMI)                               | Table 3           |
|                           | Waist circumference                                 | Table 3           |
|                           | Waist-hip ratio                                     | Table 3           |
|                           | Lean body mass                                      | Table 3           |
|                           | Fat mass                                            | Table 3           |
|                           | Percentage body fat                                 | Table 3           |
| Blood pressure            | Hypertension                                        | Figure 2, Table 2 |
|                           | Systolic blood pressure                             | Table 4           |
|                           | Diastolic blood pressure                            | Table 4           |
| Glucose metabolism        | Fasting plasma glucose                              | Table 4           |
|                           | 2-hour plasma glucose                               | Table 4           |
|                           | Fasting serum insulin                               | Table 4           |
|                           | 2-hour serum insulin                                | Table 4           |
|                           | Homeostatic model assessment for insulin resistance | Table 4           |
| Lipid profile             | Total cholesterol                                   | Web Table 4       |
|                           | HDL cholesterol                                     | Web Table 4       |
|                           | LDL cholesterol                                     | Web Table 4       |
|                           | Triglycerides                                       | Web Table 4       |
|                           | Lipoprotein (a)                                     | Web Table 4       |
|                           | Apolipoprotein A1                                   | Web Table 4       |
|                           | Apolipoprotein B                                    | Web Table 4       |
| Inflammatory markers      | High-sensitivity C-reactive protein                 | Table 4           |
|                           | Blood leukocytes                                    | Table 4           |
| Fatty liver markers       | Fatty liver index >30                               | Figure 2, Table 2 |
|                           | Plasma alanine aminotransferase                     | Table 4           |
|                           | Plasma aspartate transaminase                       | Table 4           |
|                           | Plasma gamma glutamate                              | Table 4           |
| Other biomarkers          | Fasting plasma uric acid                            | Table 4           |
|                           | Plasma urea                                         | Table 4           |
|                           | Plasma albumin                                      | Table 4           |

Abbreviations: HDL, high-density lipoprotein; LDL, low-density lipoprotein.

Web Table 4. Geometric means <sup>a</sup> (SD) for controls and mean differences (95% CIs) in plasma lipids in young women and men born preterm compared with their controls at term, Northern Finland, 2009-2011.

|                           | Model <sup>b</sup> | Women       |                 |             |         |                 |             | N    |         |
|---------------------------|--------------------|-------------|-----------------|-------------|---------|-----------------|-------------|------|---------|
|                           |                    | Controls    | Early preterm   |             |         | Late preterm    |             |      |         |
|                           |                    | Mean (SD)   | Mean Difference | 95% CI      | P Value | Mean Difference | 95% CI      |      | P Value |
| Total cholesterol, mmol/l |                    | 4.7 (1.20)  |                 |             |         |                 |             |      |         |
|                           | 1                  |             | -2.3%           | -7.0, 2.6   | 0.34    | -0.4%           | -4.2, 3.7   | 0.85 | 361     |
|                           | 2                  |             | -2.6%           | -7.6, 2.7   | 0.33    | -1.0%           | -5.0, 3.2   | 0.63 | 352     |
|                           | 3                  |             | -2.3%           | -7.0, 2.8   | 0.37    | -0.4%           | -4.3, 3.7   | 0.85 | 351     |
|                           | 4                  |             | -3.1%           | -8.2, 2.2   | 0.25    | -1.3%           | -5.3, 3.0   | 0.56 | 342     |
|                           | 5                  |             | -2.2%           | -7.3, 3.1   | 0.41    | -0.6%           | -4.6, 3.7   | 0.79 | 342     |
| HDL cholesterol, mmol/l   |                    | 1.8 (1.25)  |                 |             |         |                 |             |      |         |
|                           | 1                  |             | -11.4%          | -16.9, -5.6 | <0.001  | -3.2%           | -8.1, 2.0   | 0.22 | 361     |
|                           | 2                  |             | -11.9%          | -17.8, -5.7 | <0.001  | -3.6%           | -8.6, 1.7   | 0.18 | 352     |
|                           | 3                  |             | -8.3%           | -13.7, -2.5 | <0.001  | -2.1%           | -6.8, 2.9   | 0.40 | 351     |
|                           | 4                  |             | -8.5%           | -14.3, -2.3 | <0.001  | -2.4%           | -7.2, 2.8   | 0.36 | 342     |
|                           | 5                  |             | -7.2%           | -12.9, -1.1 | 0.02    | -1.3%           | -6.1, 3.7   | 0.61 | 342     |
| LDL cholesterol, mmol/l   |                    | 2.7 (1.35)  |                 |             |         |                 |             |      |         |
|                           | 1                  |             | 1.3%            | -6.6, 9.8   | 0.76    | 0.0%            | -6.4, 6.8   | 1.00 | 361     |
|                           | 2                  |             | 1.3%            | -7.4, 10.7  | 0.78    | -0.4%           | -7.1, 6.8   | 0.91 | 352     |
|                           | 3                  |             | -0.5%           | -8.3, 8.0   | 0.91    | -0.5%           | -6.8, 6.3   | 0.89 | 351     |
|                           | 4                  |             | -1.0%           | -9.4, 8.3   | 0.83    | -1.0%           | -7.7, 6.1   | 0.77 | 342     |
|                           |                    |             | -0.4%           | -8.9, 9.0   | 0.94    | -0.6%           | -7.3, 6.6   | 0.87 | 342     |
| Triglycerides, mmol/l     |                    | 1.0 (1.61)  |                 |             |         |                 |             |      |         |
|                           | 1                  |             | 1.5%            | -11.3, 16.1 | 0.83    | 5.1%            | -5.8, 17.2  | 0.37 | 361     |
|                           | 2                  |             | -0.8%           | -14.2, 14.7 | 0.92    | 1.5%            | -9.4, 13.7  | 0.80 | 352     |
|                           | 3                  |             | -3.1%           | -15.1, 10.7 | 0.65    | 2.1%            | -8.3, 13.7  | 0.70 | 351     |
|                           | 4                  |             | -6.8%           | -19.3, 7.5  | 0.33    | -1.9%           | -12.2, 9.7  | 0.74 | 342     |
|                           |                    |             | -2.6%           | -14.9, 11.5 | 0.70    | 1.4%            | -8.7, 12.7  | 0.79 | 342     |
| Lipoprotein (a), mg/l     |                    | 93.6 (3.28) |                 |             |         |                 |             |      |         |
|                           | 1                  |             | 4.9%            | -25.5, 47.7 | 0.78    | -6.5%           | -29.4, 23.9 | 0.64 | 338     |
|                           | 2                  |             | 0.4%            | -30.4, 44.7 | 0.98    | -4.6%           | -28.7, 27.6 | 0.75 | 329     |
|                           | 3                  |             | 1.5%            | -28.4, 43.9 | 0.93    | -10.3%          | -32.6, 19.6 | 0.46 | 328     |
|                           | 4                  |             | -1.2%           | -32.0, 43.5 | 0.95    | -8.3%           | -31.7, 23.2 | 0.57 | 319     |
|                           |                    |             | -1.1%           | -32.1, 44.0 | 0.95    | -8.2%           | -31.8, 23.6 | 0.57 | 319     |
| Apolipoprotein A1, g/l    |                    | 1.7 (1.21)  |                 |             |         |                 |             |      |         |
|                           | 1                  |             | -9.7%           | -14.7, -4.5 | <0.001  | -2.9%           | -7.3, 1.7   | 0.22 | 347     |
|                           | 2                  |             | -11.0%          | -16.3, -5.4 | <0.001  | -4.2%           | -8.7, 0.6   | 0.08 | 338     |
|                           | 3                  |             | -8.2%           | -13.3, -2.8 | 0.003   | -2.7%           | -7.1, 2.0   | 0.26 | 337     |
|                           | 4                  |             | -9.6%           | -15.0, -3.9 | 0.001   | -4.0%           | -8.5, 0.8   | 0.10 | 328     |



|                       |   |            |       |             |       |       |           |      |     |
|-----------------------|---|------------|-------|-------------|-------|-------|-----------|------|-----|
| Apolipoprotein B, g/l |   | 0.7 (1.32) | -7.7% | -12.8, -2.3 | 0.006 | -2.5% | -6.7, 2.0 | 0.27 | 328 |
|                       | 1 |            | 1.5%  | -5.6, 9.2   | 0.68  | -0.1% | -5.9, 6.0 | 0.98 | 347 |
|                       | 2 |            | 1.2%  | -6.6, 9.7   | 0.77  | -0.9% | -7.0, 5.6 | 0.77 | 338 |
|                       | 3 |            | -0.6% | -7.6, 6.9   | 0.86  | -0.7% | -6.4, 5.4 | 0.83 | 337 |
|                       | 4 |            | -2.1% | -9.6, 6.1   | 0.61  | -1.9% | -7.8, 4.4 | 0.55 | 328 |
|                       |   |            | -0.9% | -8.4, 7.3   | 0.82  | -1.0% | -7.0, 5.3 | 0.74 | 328 |

Web Table 4. (Continued.)

|                           | Model <sup>b</sup> | Men         |                 |             |         |                 |             | N    |         |
|---------------------------|--------------------|-------------|-----------------|-------------|---------|-----------------|-------------|------|---------|
|                           |                    | Controls    | Early preterm   |             |         | Late preterm    |             |      |         |
|                           |                    | Mean (SD)   | Mean Difference | 95% CI      | P Value | Mean Difference | 95% CI      |      | P Value |
| Total cholesterol, mmol/l |                    | 4.5 (1.22)  |                 |             |         |                 |             |      |         |
|                           | 1                  |             | 1.3%            | -4.3, 7.2   | 0.66    | 2.6%            | -2.0, 7.5   | 0.27 | 349     |
|                           | 2                  |             | 1.2%            | -4.4, 7.2   | 0.67    | 0.6%            | -4.1, 5.5   | 0.80 | 342     |
|                           | 3                  |             | 1.7%            | -4.0, 7.7   | 0.57    | 1.6%            | -3.1, 6.4   | 0.52 | 340     |
|                           | 4                  |             | 1.4%            | -4.3, 7.4   | 0.65    | -1.0%           | -5.6, 3.9   | 0.68 | 333     |
| HDL cholesterol, mmol/l   |                    | 1.4 (1.26)  |                 |             |         |                 |             |      |         |
|                           | 1                  |             | -1.2%           | -7.3, 5.2   | 0.70    | -4.1%           | -8.9, 0.9   | 0.11 | 349     |
|                           | 2                  |             | -2.9%           | -8.9, 3.5   | 0.36    | -5.4%           | -10.3, -0.3 | 0.04 | 342     |
|                           | 3                  |             | -1.2%           | -7.2, 5.1   | 0.70    | -2.5%           | -7.3, 2.6   | 0.33 | 340     |
|                           | 4                  |             | -2.2%           | -8.1, 4.1   | 0.49    | -3.4%           | -8.3, 1.7   | 0.19 | 333     |
| LDL cholesterol, mmol/l   |                    | 2.8 (1.37)  |                 |             |         |                 |             |      |         |
|                           | 1                  |             | 0.0%            | -8.8, 9.6   | 1.00    | 6.3%            | -1.4, 14.6  | 0.11 | 349     |
|                           | 2                  |             | -0.2%           | -9.3, 9.8   | 0.96    | 3.4%            | -4.4, 11.9  | 0.40 | 342     |
|                           | 3                  |             | 0.6%            | -8.3, 10.3  | 0.90    | 3.9%            | -3.6, 12.0  | 0.31 | 340     |
|                           | 4                  |             | 0.4%            | -8.7, 10.5  | 0.93    | 0.4%            | -7.3, 8.7   | 0.92 | 333     |
| Triglycerides, mmol/l     |                    | 1.9 (1.51)  |                 |             |         |                 |             |      |         |
|                           | 1                  |             | 6.4%            | -6.5, 21.0  | 0.34    | 5.9%            | -4.7, 17.6  | 0.28 | 349     |
|                           | 2                  |             | 8.3%            | -5.1, 23.5  | 0.24    | 3.7%            | -7.1, 15.6  | 0.52 | 342     |
|                           | 3                  |             | 7.1%            | -5.1, 20.9  | 0.26    | 0.6%            | -8.8, 11.0  | 0.90 | 340     |
|                           | 4                  |             | 7.8%            | -4.7, 22.0  | 0.23    | -2.6%           | -12.2, 8.0  | 0.61 | 333     |
| Lipoprotein (a), mg/l     |                    | 91.0 (3.19) |                 |             |         |                 |             |      |         |
|                           | 1                  |             | -4.9%           | -33.0, 34.8 | 0.78    | 2.4%            | -23.1, 36.4 | 0.87 | 331     |
|                           | 2                  |             | -2.0%           | -31.9, 40.9 | 0.91    | 4.0%            | -23.2, 40.7 | 0.80 | 325     |
|                           | 3                  |             | -5.1%           | -33.5, 35.3 | 0.77    | 1.7%            | -23.9, 35.9 | 0.91 | 322     |
|                           | 4                  |             | -7.1%           | -35.6, 34.1 | 0.69    | -1.1%           | -27.3, 34.5 | 0.94 | 316     |
| Apolipoprotein A1, g/l    |                    | 1.4 (1.17)  |                 |             |         |                 |             |      |         |

|                       |   |            |       |            |      |       |            |      |     |
|-----------------------|---|------------|-------|------------|------|-------|------------|------|-----|
|                       | 1 |            | -1.7% | -5.8, 2.7  | 0.45 | -2.0% | -5.5, 1.5  | 0.26 | 343 |
|                       | 2 |            | -2.7% | -6.9, 1.8  | 0.23 | -3.2% | -6.7, 0.4  | 0.08 | 337 |
|                       | 3 |            | -1.7% | -6.0, 2.7  | 0.44 | -1.2% | -4.7, 2.4  | 0.50 | 334 |
|                       | 4 |            | -2.1% | -6.4, 2.3  | 0.34 | -2.2% | -5.8, 1.5  | 0.24 | 328 |
| Apolipoprotein B, g/l |   | 0.8 (1.31) |       |            |      |       |            |      |     |
|                       | 1 |            | 1.8%  | -5.9, 10.1 | 0.66 | 5.6%  | -1.0, 12.6 | 0.10 | 343 |
|                       | 2 |            | 2.2%  | -5.8, 10.8 | 0.60 | 3.2%  | -3.6, 10.4 | 0.37 | 337 |
|                       | 3 |            | 2.4%  | -5.3, 10.6 | 0.55 | 3.4%  | -3.0, 10.1 | 0.30 | 334 |
|                       | 4 |            | 2.2%  | -5.6, 10.6 | 0.59 | 0.0%  | -6.4, 6.9  | 0.99 | 328 |

Abbreviations: CI, confidence interval; SD, standard deviation.

<sup>a</sup>The geometric mean is the  $n^{\text{th}}$  root of the product of  $n$  values. Geometric standard deviation (SD) corresponds to the relative change in a variable corresponding to one standard deviation unit change in the logarithm of the variable. P values are for mean differences between preterm groups and controls.

<sup>b</sup>Multiple regression models are: model 1, adjusted for sex, age and cohort; model 2, adjusted as for model 1 + parental educational attainment, maternal smoking during pregnancy, birth weight SD score, parent's hypertension, diabetes and myocardial infarction /stroke; model 3, adjusted for model 1 + BMI, self-reported physical activity, daily smoking; model 4, adjusted as for model 2 +3; model 5 (women only), adjusted for model 4 + hormonal contraception.
